# Supplementary material for: Should small-ranged species always be prioritised for conservation?
Source: Research Square preprint supplement (doi:10.21203/rs.3.rs-6528661/v1), 2025-05-07
Supplement: Supplementary file 1 [file bff4fb5a50c2a3476c814538.docx]

**Supplementary Information**

Journal: Biodiversity and Conservation

Title: Should small-ranged species always be prioritised for conservation?

Authors: Giese et al.

The following supplementary information is available for this article:

**Table S1.** List of desiccation-tolerant vascular plants used in this study and their respective dataset reference to Global Biodiversity Information Facility database (GBIF). All occurrences records were downloaded from GBIF.org on 22 March 2023.

| Species | | Gbif doi |
| --- | --- | --- |
| ANEMIACEAE | |  |
|  | *Anemia ferruginea* Kunth | doi.org/10.15468/dl.sa9zab |
|  | *Anemia flexuosa* (Savigny) Sw. | doi.org/10.15468/dl.vde2cc |
|  | *Anemia mexicana* Klotzsch | doi.org/10.15468/dl.k9mbkq |
|  | *Anemia rotundifolia* Schrad. | doi.org/10.15468/dl.epbqcq |
|  | *Anemia tomentosa* (Savigny) Sw. | doi.org/10.15468/dl.3tmkpy |
|  | *Anemia villosa* Humb. & Bonpl. ex Willd. | doi.org/10.15468/dl.j43tqx |
|  | *Mohria caffrorum* (L.) Desv. | doi.org/10.15468/dl.npnhhm |
| ASPLENIACEAE | |  |
|  | *Asplenium adiantum-nigrum* L. | doi.org/10.15468/dl.7pppyw |
|  | *Asplenium aethiopicum* (Burm. f.) Bech. | doi.org/10.15468/dl.hjqzcy |
|  | *Asplenium ceterach* L. | doi.org/10.15468/dl.k7vbgr |
|  | *Asplenium cordatum* (Thunb.) Sw. | doi.org/10.15468/dl.v6deag |
|  | *Asplenium dalhousiae* Hook. | doi.org/10.15468/dl.upva47 |
|  | *Asplenium friesiorum* C. Chr. | doi.org/10.15468/dl.gen6n3 |
|  | *Asplenium megalura* Hieron. | doi.org/10.15468/dl.uweaw5 |
|  | *Asplenium monanthes* L. | doi.org/10.15468/dl.6c9ztx |
|  | *Asplenium obovatum* Viv. | doi.org/10.15468/dl.a9tgsp |
|  | *Asplenium praegracile* Rosenst. | doi.org/10.15468/dl.vet62p |
|  | *Asplenium pringlei* Davenp. | doi.org/10.15468/dl.53g72r |
|  | *Asplenium ruta-muraria* L. | doi.org/10.15468/dl.x2x8ej |
|  | *Asplenium rutifolium* (P.J. Bergius) Kunze | doi.org/10.15468/dl.4e9y4h |
|  | *Asplenium sandersonii* Hook. | doi.org/10.15468/dl.k5hxv2 |
|  | *Asplenium septentrionale* (L.) Hoffm. | doi.org/10.15468/dl.eseasq |
|  | *Asplenium theciferum* (Kunth) Mett. | doi.org/10.15468/dl.5mdju7 |
|  | *Asplenium trichomanes* L. | doi.org/10.15468/dl.5m7wdb |
|  | *Asplenium uhligii* Hieron. | doi.org/10.15468/dl.5u77u2 |
|  | *Pleurosorus rutifolius* Fée | doi.org/10.15468/dl.pfykca |
| BORYACEAE | |  |
|  | *Borya constricta* Churchill | doi.org/10.15468/dl.azjcre |
|  | *Borya inopinata* P.I. Forst. & E.J. Thomps. | doi.org/10.15468/dl.5vyu6h |
|  | *Borya mirabilis* Churchill | doi.org/10.15468/dl.4u7yvh |
|  | *Borya nitida* Labill. | doi.org/10.15468/dl.6f4hvs |
|  | *Borya scirpoidea* Lindl. | doi.org/10.15468/dl.mc6zqm |
|  | *Borya septentrionalis* F. Muell. | doi.org/10.15468/dl.pznhwz |
|  | *Borya sphaerocephala* R. Br. | doi.org/10.15468/dl.4hfbhc |
| BROMELIACEAE | |  |
|  | *Pitcairnia lanuginosa* Ruiz & Pav. | doi.org/10.15468/dl.p4szxw |
| CACTACEAE | |  |
|  | *Blossfeldia liliputana* Werderm. | doi.org/10.15468/dl.69baj9 |
| CYPERACEAE | |  |
|  | *Afrotrilepis pilosa* (Boeckeler) J. Raynal | doi.org/10.15468/dl.n52wrd |
|  | *Coleochloa abyssinica* (Hochst. ex A. Rich.) Gilly | doi.org/10.15468/dl.japukw |
|  | *Coleochloa microcephala* Nelmes | doi.org/10.15468/dl.jycdrx |
|  | *Coleochloa pallidior* Nelmes | doi.org/10.15468/dl.ps6mdw |
|  | *Coleochloa setifera* (Ridl.) Gilly | doi.org/10.15468/dl.jxfrsy |
|  | *Microdracoides squamosus* Hua | doi.org/10.15468/dl.6pwvgd |
|  | *Trilepis ciliatifolia* T. Koyama | doi.org/10.15468/dl.td7jpp |
|  | *Trilepis lhotzkiana* Nees ex Arn. | doi.org/10.15468/dl.w5mmwh |
|  | *Trilepis microstachya* (C.B. Clarke) H. Pfeiff. | doi.org/10.15468/dl.x6cyth |
| DAVALLIACEAE | |  |
|  | *Davallia angustata* Wall. ex Hook. & Grev. | doi.org/10.15468/dl.2298zs |
|  | *Elaphoglossum acrostichoides* (Hook. & Grev.) Schelpe | doi.org/10.15468/dl.698qkw |
|  | *Elaphoglossum petiolatum* (Sw.) Urb. | doi.org/10.15468/dl.8q88sf |
|  | *Elaphoglossum piloselloides* (C. Presl) T. Moore | doi.org/10.15468/dl.z282q4 |
| GESNERIACEAE | |  |
|  | *Boea hygrometrica* (Bunge) R. Br. | doi.org/10.15468/dl.uedr97 |
|  | *Boea hygroscopica* F. Muell. | doi.org/10.15468/dl.4smyuc |
|  | *Damrongia clarkeana* (Hemsl.) C. Puglisi | doi.org/10.15468/dl.3wg7vn |
|  | *Haberlea rhodopensis* Friv. | doi.org/10.15468/dl.tsuzdp |
|  | *Oreocharis mileensis* (W.T. Wang) Mich. Möller & A. Weber | doi.org/10.15468/dl.euea3q |
|  | *Paraboea crassifolia* (Hemsl.) B.L. Burtt | doi.org/10.15468/dl.qp5hf8 |
|  | *Paraboea rufescens* (Franch.) B.L. Burtt | doi.org/10.15468/dl.fgf6s4 |
|  | *Ramonda myconi* (L.) Rchb. | doi.org/10.15468/dl.petm8e |
|  | *Ramonda nathaliae* Pančić & Petrovič | doi.org/10.15468/dl.7aeqcg |
|  | *Ramonda serbica* Pančić | doi.org/10.15468/dl.fw7ngm |
| HYMENOPHYLLACEAE | |  |
|  | *Cardiomanes reniforme* (G. Forst.) C. Presl | doi.org/10.15468/dl.27wr9f |
|  | *Crepidomanes chevalieri* (Christ) Ebihara & Dubuisson | doi.org/10.15468/dl.we3am5 |
|  | *Crepidomanes frappieri* (Cordem.) J.P. Roux | doi.org/10.15468/dl.2m7evw |
|  | *Crepidomanes inopinatum* (Pic. Serm.) J.P. Roux | doi.org/10.15468/dl.ahznv9 |
|  | *Crepidomanes melanotrichum* (Schltdl.) J.P. Roux | doi.org/10.15468/dl.r2sdq5 |
|  | *Didymoglossum erosum* (Willd.) J.P. Roux | doi.org/10.15468/dl.9avcdb |
|  | *Hymenoglossum cruentum* (Cav.) C. Presl | doi.org/10.15468/dl.thmyfs |
|  | *Hymenophyllum capillare* Desv. | doi.org/10.15468/dl.wqpewp |
|  | *Hymenophyllum caudiculatum* Mart. | doi.org/10.15468/dl.tekt8z |
|  | *Hymenophyllum dentatum* Cav. | doi.org/10.15468/dl.98f432 |
|  | *Hymenophyllum fucoides* (Sw.) Sw. | doi.org/10.15468/dl.vqx8mx |
|  | *Hymenophyllum hirsutum* (L.) Sw. | doi.org/10.15468/dl.rr3cxv |
|  | *Hymenophyllum kuhnii* C. Chr. | doi.org/10.15468/dl.f529nm |
|  | *Hymenophyllum peltatum* (Poir.) Desv. | doi.org/10.15468/dl.6vh9hg |
|  | *Hymenophyllum plicatum* Kaulf. | doi.org/10.15468/dl.bq2wu8 |
|  | *Hymenophyllum polyanthos* (Sw.) Sw. | doi.org/10.15468/dl.qywftz |
|  | *Hymenophyllum sanguinolentum* (G. Forst.) Sw. | doi.org/10.15468/dl.yeta3s |
|  | *Hymenophyllum splendidum* Bosch | doi.org/10.15468/dl.7j4fhq |
|  | *Hymenophyllum tunbrigense* (L.) Sm. | doi.org/10.15468/dl.z9k99v |
|  | *Polyphlebium borbonicum* (Bosch) Ebihara & Dubuisson | doi.org/10.15468/dl.zvdfg9 |
|  | *Trichomanes bucinatum* Mickel & Beitel | doi.org/10.15468/dl.8r8yub |
|  | *Trichomanes capillaceum* L. | doi.org/10.15468/dl.tumgu7 |
|  | *Trichomanes diaphanum* Kunth | doi.org/10.15468/dl.qz2n6y |
|  | *Trichomanes polypodioides* L. | doi.org/10.15468/dl.s4h6jx |
|  | *Trichomanes pyxidiferum* L. | doi.org/10.15468/dl.hgn9q4 |
|  | *Trichomanes radicans* Sw. | doi.org/10.15468/dl.28ycp2 |
|  | *Trichomanes rigidum* Sw. | doi.org/10.15468/dl.6y7be5 |
| ISOETACEAE | |  |
|  | *Isoetes australis* R.O. Williams | doi.org/10.15468/dl.a3hgeg |
| LINDERNIACEAE | |  |
|  | *Craterostigma hirsutum* S. Moore | doi.org/10.15468/dl.cmwwns |
|  | *Craterostigma lanceolatum* (Engl.) Skan | doi.org/10.15468/dl.k8qdxz |
|  | *Craterostigma plantagineum* Hochst. | doi.org/10.15468/dl.pnxv3a |
|  | *Craterostigma pumilum* Hochst. | doi.org/10.15468/dl.5hhk74 |
|  | *Craterostigma wilmsii* Engl. ex Diels | doi.org/10.15468/dl.26h4xy |
|  | *Lindernia brevidens* Skan | doi.org/10.15468/dl.3grqxn |
|  | *Lindernia intrepidus* (Dinter) Oberm. | doi.org/10.15468/dl.7bamba |
|  | *Lindernia monroi* (S. Moore) Eb. Fisch. | doi.org/10.15468/dl.hmpnq7 |
|  | *Lindernia purpurea* (Lebrun & Touss.) R. Germ. | doi.org/10.15468/dl.93cpxk |
|  | *Linderniella pulchella* (Skan) Eb. Fisch., Schäferh. & Kai Müll. | doi.org/10.15468/dl.fns8vw |
|  | *Linderniella wilmsii* (Engl. ex Diels) Eb. Fisch., Schäferh. & Kai Müll. | doi.org/10.15468/dl.et4dwe |
| MYROTHAMNACEAE | |  |
|  | *Myrothamnus flabellifolius* Welw. | doi.org/10.15468/dl.cndpau |
|  | *Myrothamnus moschatus* (Baill.) Baill. ex Nied. | doi.org/10.15468/dl.rjsf4g |
| POACEAE | |  |
|  | *Eragrostiella bifaria* (Vahl) Bor | doi.org/10.15468/dl.gdhn3z |
|  | *Eragrostiella brachyphylla* (Stapf) Bor | doi.org/10.15468/dl.2du7jn |
|  | *Eragrostiella nardoides* (Trin.) Bor | doi.org/10.15468/dl.xqes2y |
|  | *Eragrostis nindensis* Ficalho & Hiern | doi.org/10.15468/dl.t6ppej |
|  | *Eragrostis paradoxa* Launert | doi.org/10.15468/dl.ehea4s |
|  | *Micrachne patentiflora* (Stent & J.M. Rattray) P.M. Peterson | doi.org/10.15468/dl.cgs4jd |
|  | *Micraira adamsii* Lazarides | doi.org/10.15468/dl.9gwnej |
|  | *Micraira lazaridis* L.G. Clark, Wendel & Craven | doi.org/10.15468/dl.bfzt9p |
|  | *Micraira multinervia* Lazarides | doi.org/10.15468/dl.phbv6k |
|  | *Micraira spinifera* Lazarides | doi.org/10.15468/dl.d6jhr9 |
|  | *Micraira subulifolia* F. Muell. | doi.org/10.15468/dl.jda3g5 |
|  | *Micraira tenuis* Lazarides | doi.org/10.15468/dl.fy5f76 |
|  | *Micraira viscidula* Lazarides | doi.org/10.15468/dl.4qkycx |
|  | *Microchloa caffra* Nees | doi.org/10.15468/dl.uu9ttf |
|  | *Microchloa indica* (L. f.) P. Beauv. | doi.org/10.15468/dl.4pek7h |
|  | *Microchloa kunthii* Desv. | doi.org/10.15468/dl.sym7kq |
|  | *Oropetium aristatum* (Stapf) Pilg. | doi.org/10.15468/dl.uuvqb7 |
|  | *Oropetium capense* Stapf | doi.org/10.15468/dl.r6247a |
|  | *Oropetium roxburghianum* S.M. Phillips | doi.org/10.15468/dl.z8m9zb |
|  | *Oropetium thomaeum* (L. f.) Trin. | doi.org/10.15468/dl.x6jrdk |
|  | *Sporobolus atrovirens* (Kunth) Kunth | doi.org/10.15468/dl.4r6ekh |
|  | *Sporobolus elongatus* R. Br. | doi.org/10.15468/dl.jb8ken |
|  | *Sporobolus festivus* Hochst. ex A. Rich. | doi.org/10.15468/dl.7k7ff4 |
|  | *Sporobolus fimbriatus* (Trin.) Nees | doi.org/10.15468/dl.ba8gp7 |
|  | *Sporobolus pellucidus* Hochst. | doi.org/10.15468/dl.7khsy2 |
|  | *Sporobolus ruspolianus* Chiov. | doi.org/10.15468/dl.6mf4vv |
|  | *Sporobolus stapfianus* Gand. | doi.org/10.15468/dl.nx4pse |
|  | *Styppeiochloa hitchcockii* (A. Camus) Cope | doi.org/10.15468/dl.ncvmhc |
|  | *Tripogon capillatus* Jaub. & Spach | doi.org/10.15468/dl.kr7gbe |
|  | *Tripogon curvatus* S.M. Phillips & Launert | doi.org/10.15468/dl.cke9zn |
|  | *Tripogon filiformis* Nees | doi.org/10.15468/dl.xk46dh |
|  | *Tripogon jacquemontii* Stapf | doi.org/10.15468/dl.bf6pxj |
|  | *Tripogon lisboae* Stapf | doi.org/10.15468/dl.xw9qxx |
|  | *Tripogon major* Hook. f. | doi.org/10.15468/dl.pmnuqm |
|  | *Tripogon polyanthus* Naik & Patunkar | doi.org/10.15468/dl.eqmadm |
|  | *Tripogonella loliiformis* (F. Muell.) P.M. Peterson & Romasch. | doi.org/10.15468/dl.gvfkbd |
|  | *Tripogonella minima* (A. Rich.) P.M. Peterson & Romasch. | doi.org/10.15468/dl.gzfvm3 |
|  | *Tripogonella spicata* (Nees) P.M. Peterson & Romasch. | doi.org/10.15468/dl.cyn2mv |
| POLYPODIACEAE | |  |
|  | *Ctenopteris heterophylla* Tindale | doi.org/10.15468/dl.zejbzk |
|  | *Goniophlebium furfuraceum* (Schltdl. & Cham.) T. Moore | doi.org/10.15468/dl.2w7hjj |
|  | *Loxogramme abyssinica* (Baker) M.G. Price | doi.org/10.15468/dl.tdve7b |
|  | *Loxogramme lanceolata* (Sw.) C. Presl | doi.org/10.15468/dl.d7bq8c |
|  | *Melpomene flabelliformis* (Poir.) A.R. Sm. & R.C. Moran | doi.org/10.15468/dl.82wkxt |
|  | *Melpomene peruviana* (Desv.) A.R. Sm. & R.C. Moran | doi.org/10.15468/dl.bswgb4 |
|  | *Microgramma piloselloides* (L.) Copel. | doi.org/10.15468/dl.xuwydq |
|  | *Pecluma eurybasis* (C. Chr.) M.G. Price | doi.org/10.15468/dl.4pjhjr |
|  | *Platycerium stemaria* (P. Beauv.) Desv. | doi.org/10.15468/dl.ffzdam |
|  | *Pleopeltis angusta* Humb. & Bonpl. ex Willd. | doi.org/10.15468/dl.4ms43y |
|  | *Pleopeltis crassinervata* (Fée) T. Moore | doi.org/10.15468/dl.kvxbuh |
|  | *Pleopeltis hirsutissima* (Raddi) de la Sota | doi.org/10.15468/dl.grv3hs |
|  | *Pleopeltis macrocarpa* (Bory ex Willd.) Kaulf. | doi.org/10.15468/dl.ekk9fu |
|  | *Pleopeltis mexicana* (Fée) Mickel & Beitel | doi.org/10.15468/dl.xfep7a |
|  | *Pleopeltis minima* (Bory) J. Prado & R.Y. Hirai | doi.org/10.15468/dl.avrds9 |
|  | *Pleopeltis plebeia* (Schltdl. & Cham.) A.R. Sm. & Tejero | doi.org/10.15468/dl.6q76fn |
|  | *Pleopeltis pleopeltifolia* (Raddi) Alston | doi.org/10.15468/dl.9aygvn |
|  | *Pleopeltis polypodioides* (L.) E.G. Andrews & Windham | doi.org/10.15468/dl.x8kzf4 |
|  | *Polypodium cambricum* L. | doi.org/10.15468/dl.6hmwga |
|  | *Polypodium interjectum* Shivas | doi.org/10.15468/dl.3eyvcr |
|  | *Polypodium remotum* Desv. | doi.org/10.15468/dl.dgvmch |
|  | *Polypodium virginianum* L. | doi.org/10.15468/dl.v7bte4 |
|  | *Polypodium vulgare* L. | doi.org/10.15468/dl.d6sc3j |
| PTERIDACEAE | |  |
|  | *Actiniopteris australis* (L. f.) Link | doi.org/10.15468/dl.dvctg3 |
|  | *Actiniopteris dimorpha* Pic. Serm. | doi.org/10.15468/dl.ku38h4 |
|  | *Actiniopteris radiata* (Sw.) Link | doi.org/10.15468/dl.w7xj3c |
|  | *Actiniopteris semiflabellata* Pic. Serm. | doi.org/10.15468/dl.u46p8v |
|  | *Adiantum hispidulum* Sw. | doi.org/10.15468/dl.mpnexj |
|  | *Adiantum incisum* Forssk. | doi.org/10.15468/dl.m4pmmc |
|  | *Adiantum latifolium* Lam. | doi.org/10.15468/dl.e5nqq9 |
|  | *Adiantum raddianum* C. Presl | doi.org/10.15468/dl.y96d4u |
|  | *Aleuritopteris albomarginata* (C.B. Clarke) Ching | doi.org/10.15468/dl.q2brh4 |
|  | *Aleuritopteris farinosa* (Forssk.) Fée | doi.org/10.15468/dl.vzzhtk |
|  | *Allosorus coriaceus* (Decne.) Christenh. | doi.org/10.15468/dl.5sremd |
|  | *Allosorus pteridioides* (Reichard) Christenh. | doi.org/10.15468/dl.2j4ya8 |
|  | *Argyrochosma fendleri* (Kunze) Windham | doi.org/10.15468/dl.nysvzz |
|  | *Astrolepis cochisensis* (Goodd.) D.M. Benham & Windham | doi.org/10.15468/dl.tewn6z |
|  | *Astrolepis integerrima* (Hook.) D.M. Benham & Windham | doi.org/10.15468/dl.9uawx5 |
|  | *Astrolepis sinuata* (Lag. ex Sw.) D.M. Benham & Windham | doi.org/10.15468/dl.ts2vtx |
|  | *Bommeria hispida* (Mett. ex Kuhn) Underw. | doi.org/10.15468/dl.php9yn |
|  | *Cheilanthes bonariensis* (Willd.) Proctor | doi.org/10.15468/dl.33k6bd |
|  | *Cheilanthes buchtienii* (Rosenst.) R.M. Tryon | doi.org/10.15468/dl.ktn4qp |
|  | *Cheilanthes capensis* (Thunb.) Sw. | doi.org/10.15468/dl.becmgd |
|  | *Cheilanthes catanensis* (Cosent.) H.P. Fuchs | doi.org/10.15468/dl.dafh4z |
|  | *Cheilanthes depauperata* Baker | doi.org/10.15468/dl.4z7rsv |
|  | *Cheilanthes dinteri* Brause | doi.org/10.15468/dl.j7e6tv |
|  | *Cheilanthes distans* (R. Br.) Mett. | doi.org/10.15468/dl.nnvwym |
|  | *Cheilanthes eckloniana* Mett. | doi.org/10.15468/dl.d3ytby |
|  | *Cheilanthes fragillima* F. Muell. | doi.org/10.15468/dl.c9v9rh |
|  | *Cheilanthes glauca* (Cav.) Mett. | doi.org/10.15468/dl.5quw65 |
|  | *Cheilanthes gracillima* D.C. Eaton | doi.org/10.15468/dl.usveyj |
|  | *Cheilanthes hirta* Sw. | doi.org/10.15468/dl.d59eff |
|  | *Cheilanthes inaequalis* (Kunze) Mett. | doi.org/10.15468/dl.xba4pw |
|  | *Cheilanthes lasiophylla* Pic. Serm. | doi.org/10.15468/dl.m9rq8d |
|  | *Cheilanthes lendigera* (Cav.) Sw. | doi.org/10.15468/dl.uvqmw6 |
|  | *Cheilanthes marginata* Kunth | doi.org/10.15468/dl.hxccfx |
|  | *Cheilanthes marlothii* (Hieron.) Domin | doi.org/10.15468/dl.ke2gxv |
|  | *Cheilanthes multifida* (Sw.) Sw. | doi.org/10.15468/dl.9csppx |
|  | *Cheilanthes myriophylla* Desv. | doi.org/10.15468/dl.93r2t5 |
|  | *Cheilanthes nitidula* Wall. ex Hook. | doi.org/10.15468/dl.auv9qf |
|  | *Cheilanthes notholaenoides* (Desv.) Maxon ex Weath. | doi.org/10.15468/dl.k6jspn |
|  | *Cheilanthes parryi* (D.C. Eaton) Domin | doi.org/10.15468/dl.xzt4gf |
|  | *Cheilanthes parviloba* Sw. | doi.org/10.15468/dl.kaxfbp |
|  | *Cheilanthes pringlei* Davenp. | doi.org/10.15468/dl.evnxrg |
|  | *Cheilanthes quadripinnata* (Forssk.) Kuhn | doi.org/10.15468/dl.m8jywm |
|  | *Cheilanthes sieberi* Kunze | doi.org/10.15468/dl.qn5f4q |
|  | *Cheilanthes tenuifolia* (Burm. f.) Sw. | doi.org/10.15468/dl.62mnf6 |
|  | *Cheilanthes tomentosa* Link | doi.org/10.15468/dl.snkpaq |
|  | *Cheilanthes viridis* (Forssk.) Sw. | doi.org/10.15468/dl.76qb8a |
|  | *Cheilanthes wrightii* Hook. | doi.org/10.15468/dl.nxy7m6 |
|  | *Cosentinia vellea* (Aiton) Tod. | doi.org/10.15468/dl.dafh4z |
|  | *Doryopteris collina* (Raddi) J. Sm. | doi.org/10.15468/dl.mpefs7 |
|  | *Doryopteris concolor* (Langsd. & Fisch.) Kuhn | doi.org/10.15468/dl.g6dnze |
|  | *Doryopteris kitchingii* (Baker) Bonap. | doi.org/10.15468/dl.jnuegy |
|  | *Doryopteris pedata* (L.) Fée | doi.org/10.15468/dl.2bac3d |
|  | *Doryopteris triphylla* (Lam.) Christ | doi.org/10.15468/dl.4xrf5t |
|  | *Doryopteris varians* (Raddi) Sm. | doi.org/10.15468/dl.dx9hp4 |
|  | *Haplopteris volkensii* (Hieron.) E.H. Crane | doi.org/10.15468/dl.sp37at |
|  | *Hemionitis palmata* L. | doi.org/10.15468/dl.c66s7c |
|  | *Hemionitis tomentosa* (Lam.) Raddi | doi.org/10.15468/dl.6nrsvt |
|  | *Myriopteris rufa* Fée | doi.org/10.15468/dl.xrecnp |
|  | *Negripteris scioana* (Chiov.) Pic. Serm. | doi.org/10.15468/dl.hv5594 |
|  | *Notholaena dipinnata* Fraser-Jenk. | doi.org/10.15468/dl.n63ua8 |
|  | *Notholaena lanuginosa* Desv. ex Poir. | doi.org/10.15468/dl.dafh4z |
|  | *Notholaena muelleri* (Hook.) Fraser-Jenk. | doi.org/10.15468/dl.thgc6z |
|  | *Onychium divaricatum* (Poir.) Alston | doi.org/10.15468/dl.y35mxa |
|  | *Paragymnopteris marantae* (L.) K.H. Shing | doi.org/10.15468/dl.tgqkfw |
|  | *Pellaea andromedifolia* (Kaulf.) Fée | doi.org/10.15468/dl.brw9km |
|  | *Pellaea atropurpurea* (L.) Link | doi.org/10.15468/dl.r4kujm |
|  | *Pellaea boivinii* Hook. | doi.org/10.15468/dl.a7as3z |
|  | *Pellaea brachyptera* (T. Moore) Baker | doi.org/10.15468/dl.rr7h9b |
|  | *Pellaea bridgesii* Hook. | doi.org/10.15468/dl.t9bqts |
|  | *Pellaea calomelanos* (Sw.) Link | doi.org/10.15468/dl.nnpkuu |
|  | *Pellaea dura* (Willd.) Hook. | doi.org/10.15468/dl.zsgpw2 |
|  | *Pellaea falcata* Fée | doi.org/10.15468/dl.v34edm |
|  | *Pellaea glabella* Mett. ex Kuhn | doi.org/10.15468/dl.6k7jc6 |
|  | *Pellaea longipilosa* Bonap. | doi.org/10.15468/dl.h38cvb |
|  | *Pellaea mucronata* (D.C. Eaton) D.C. Eaton | doi.org/10.15468/dl.7yjd8k |
|  | *Pellaea ovata* (Desv.) Weath. | doi.org/10.15468/dl.vdajbu |
|  | *Pellaea pectiniformis* Baker | doi.org/10.15468/dl.7xkaek |
|  | *Pellaea rotundifolia* (G. Forst.) Hook. | doi.org/10.15468/dl.8hy8j9 |
|  | *Pellaea sagittata* (Cav.) Link | doi.org/10.15468/dl.bx8thv |
|  | *Pellaea ternifolia* (Cav.) Link | doi.org/10.15468/dl.cbmtcn |
|  | *Pellaea truncata* Goodd. | doi.org/10.15468/dl.dn3w7t |
|  | *Pellaea wrightiana* Hook. | doi.org/10.15468/dl.9rd92u |
|  | *Pentagramma triangularis* (Kaulf.) Yatsk., Windham & E. Wollenw. | doi.org/10.15468/dl.qk7txw |
|  | *Vittaria guineensis* Desv. | doi.org/10.15468/dl.8ng3dd |
|  | *Vittaria isoetifolia* Bory | doi.org/10.15468/dl.ynkgvh |
| SCHIZAEACEAE | |  |
|  | *Schizaea pusilla* Pursh | doi.org/10.15468/dl.4hhv6k |
| SELAGINELLACEAE | |  |
|  | *Selaginella arizonica* Maxon | doi.org/10.15468/dl.sgt2tu |
|  | *Selaginella bryopteris* Baker | doi.org/10.15468/dl.gkjxpw |
|  | *Selaginella caffrorum* (Milde) Hieron. | doi.org/10.15468/dl.frchjk |
|  | *Selaginella convoluta* (Arn.) Spring | doi.org/10.15468/dl.xd6ake |
|  | *Selaginella densa* Rydb. | doi.org/10.15468/dl.2krpnn |
|  | *Selaginella digitata* Spring | doi.org/10.15468/dl.k6eka7 |
|  | *Selaginella dregei* (C. Presl) Hieron. | doi.org/10.15468/dl.g2dbs3 |
|  | *Selaginella echinata* Baker | doi.org/10.15468/dl.3rrvn2 |
|  | *Selaginella eremophila* Maxon | doi.org/10.15468/dl.yjqekh |
|  | *Selaginella helicoclada* Alston | doi.org/10.15468/dl.m4w6rh |
|  | *Selaginella helvetica* (L.) Spring | doi.org/10.15468/dl.z4srkk |
|  | *Selaginella imbricata* (Forssk.) Spring ex Decne. | doi.org/10.15468/dl.gkjxpw |
|  | *Selaginella lepidophylla* (Hook. & Grev.) Spring | doi.org/10.15468/dl.hpdjsj |
|  | *Selaginella nivea* Alston | doi.org/10.15468/dl.4n449x |
|  | *Selaginella njamnjamensis* Hieron. | doi.org/10.15468/dl.5uud4g |
|  | *Selaginella peruviana* (Milde) Hieron. | doi.org/10.15468/dl.7zywft |
|  | *Selaginella phillipsiana* (Hieron.) Alston | doi.org/10.15468/dl.j568ks |
|  | *Selaginella pilifera* A. Braun | doi.org/10.15468/dl.nfqtwa |
|  | *Selaginella rupincola* Underw. | doi.org/10.15468/dl.p34w5f |
|  | *Selaginella sartorii* Hieron. | doi.org/10.15468/dl.t5vsy8 |
|  | *Selaginella sellowii* Hieron. | doi.org/10.15468/dl.4zt397 |
|  | *Selaginella tamariscina* (P. Beauv.) Spring | doi.org/10.15468/dl.dpm3g2 |
|  | *Selaginella trisulcata* Aspl. | doi.org/10.15468/dl.m49rbn |
|  | *Selaginella yemensis* (Sw.) Spring | doi.org/10.15468/dl.b73j9x |
| TECTARIACEAE | |  |
|  | *Arthropteris orientalis* (J.F. Gmel.) Posth. | doi.org/10.15468/dl.yfu9nx |
| VELLOZIACEAE | |  |
|  | *Acanthochlamys bracteata* P.C. Kao | doi.org/10.15468/dl.tc6vaj |
|  | *Barbacenia blackii* L.B. Sm. | doi.org/10.15468/dl.dea6tj |
|  | *Barbacenia fanniae* (N.L. Menezes) Mello-Silva | doi.org/10.15468/dl.42336d |
|  | *Barbacenia flava* Mart. ex Schult. f. | doi.org/10.15468/dl.d7yq3k |
|  | *Barbacenia fragrans* Goethart & Henrard | doi.org/10.15468/dl.u7jbpr |
|  | *Barbacenia gentianoides* Goethart & Henrard | doi.org/10.15468/dl.scjhe7 |
|  | *Barbacenia gounelleana* Beauverd | doi.org/10.15468/dl.ntkmb3 |
|  | *Barbacenia graminifolia* L.B. Sm. | doi.org/10.15468/dl.fu9dsg |
|  | *Barbacenia longiflora* Mart. | doi.org/10.15468/dl.6xsqsg |
|  | *Barbacenia longiscapa* Goethart & Henrard | doi.org/10.15468/dl.xb5sv7 |
|  | *Barbacenia macrantha* Lem. | doi.org/10.15468/dl.ra3s87 |
|  | *Barbacenia purpurea* Hook. | doi.org/10.15468/dl.strqx6 |
|  | *Barbacenia riedeliana* Goethart & Henrard | doi.org/10.15468/dl.wnqdnc |
|  | *Barbacenia seubertiana* Goethart & Henrard | doi.org/10.15468/dl.h885my |
|  | *Barbacenia spectabilis* L.B. Sm. & Ayensu | doi.org/10.15468/dl.646as8 |
|  | *Barbacenia tomentosa* Mart. | doi.org/10.15468/dl.qmu23t |
|  | *Barbaceniopsis boliviensis* (Baker) L.B. Sm. | doi.org/10.15468/dl.yfy33v |
|  | *Barbaceniopsis humahuaquensis* Noher | doi.org/10.15468/dl.w5nw3n |
|  | *Vellozia albiflora* Pohl | doi.org/10.15468/dl.pv5vq2 |
|  | *Vellozia andina* Ibisch, R. Vásquez & Nowicki | doi.org/10.15468/dl.4rf6ce |
|  | *Vellozia angustifolia* Goethart & Henrard | doi.org/10.15468/dl.3trncs |
|  | *Vellozia candida* J.C. Mikan | doi.org/10.15468/dl.56bfsv |
|  | *Vellozia caput-ardeae* L.B. Sm. & Ayensu | doi.org/10.15468/dl.apnykz |
|  | *Vellozia caruncularis* Mart. ex Seub. | doi.org/10.15468/dl.t8vs2q |
|  | *Vellozia ciliata* L.B. Sm. | doi.org/10.15468/dl.q6487f |
|  | *Vellozia compacta* Mart. ex Schult. f. | doi.org/10.15468/dl.ceebkb |
|  | *Vellozia declinans* Goethart & Henrard | doi.org/10.15468/dl.yjspn5 |
|  | *Vellozia epidendroides* Mart. ex Schult. f. | doi.org/10.15468/dl.kb97qr |
|  | *Vellozia flavicans* Mart. ex Schult. f. | doi.org/10.15468/dl.qwzbxg |
|  | *Vellozia glochidea* Pohl | doi.org/10.15468/dl.8trmju |
|  | *Vellozia hatschbachii* L.B. Sm. & Ayensu | doi.org/10.15468/dl.sccdse |
|  | *Vellozia hirsuta* Goethart & Henrard | doi.org/10.15468/dl.4a35fn |
|  | *Vellozia nanuzae* L.B. Sm. & Ayensu | doi.org/10.15468/dl.emp5nx |
|  | *Vellozia nivea* L.B. Sm. & Ayensu | doi.org/10.15468/dl.wjab47 |
|  | *Vellozia plicata* Mart. | doi.org/10.15468/dl.kjrpja |
|  | *Vellozia pulchra* L.B. Sm. | doi.org/10.15468/dl.2j85fg |
|  | *Vellozia resinosa* Mart. ex Schult. f. | doi.org/10.15468/dl.tt5kbz |
|  | *Vellozia sellowii* Seub. | doi.org/10.15468/dl.atkrnf |
|  | *Vellozia semirii* Mello-Silva & N.L. Menezes | doi.org/10.15468/dl.yn5g4f |
|  | *Vellozia squalida* Mart. ex Schult. f. | doi.org/10.15468/dl.qmfuxz |
|  | *Vellozia streptophylla* L.B. Sm. | doi.org/10.15468/dl.2uk6z3 |
|  | *Vellozia subscabra* J.C. Mikan | doi.org/10.15468/dl.v7y6ux |
|  | *Vellozia taxifolia* (Mart. ex Schult. f.) Mart. ex Seub. | doi.org/10.15468/dl.z6cdrs |
|  | *Vellozia tubiflora* (A. Rich.) Kunth | doi.org/10.15468/dl.xsh9uu |
|  | *Vellozia variabilis* Mart. ex Schult. f. | doi.org/10.15468/dl.h78xms |
|  | *Vellozia variegata* Goethart & Henrard | doi.org/10.15468/dl.dzhvby |
|  | *Vellozia verruculosa* Mart. ex Schult. f. | doi.org/10.15468/dl.nbsddt |
|  | *Xerophyta dasylirioides* Baker | doi.org/10.15468/dl.at9m53 |
|  | *Xerophyta eglandulosa* H. Perrier | doi.org/10.15468/dl.cfgra3 |
|  | *Xerophyta elegans* (Balf.) Baker | doi.org/10.15468/dl.pupthf |
|  | *Xerophyta equisetoides* Baker | doi.org/10.15468/dl.eczrnm |
|  | *Xerophyta humilis* (Baker) T. Durand & Schinz | doi.org/10.15468/dl.rr4nrq |
|  | *Xerophyta nandrasanae* Phillipson & Lowry | doi.org/10.15468/dl.h42xye |
|  | *Xerophyta pectinata* Baker | doi.org/10.15468/dl.rfsbps |
|  | *Xerophyta pinifolia* Lam. | doi.org/10.15468/dl.6677cg |
|  | *Xerophyta retinervis* Baker | doi.org/10.15468/dl.84bsa6 |
|  | *Xerophyta rippsteinii* L.B. Sm., J.-P. Lebrun & Stork | doi.org/10.15468/dl.pdy6fj |
|  | *Xerophyta scabrida* (Pax) T. Durand & Schinz | doi.org/10.15468/dl.6r72gy |
|  | *Xerophyta schlechteri* (Baker) N.L. Menezes | doi.org/10.15468/dl.2uz55d |
|  | *Xerophyta schnizleinia* (L.B. Sm. & Ayensu) Baker | doi.org/10.15468/dl.suyyuq |
|  | *Xerophyta spekei* Baker | doi.org/10.15468/dl.e8sbpb |
|  | *Xerophyta splendens* (Rendle) N.L. Menezes | doi.org/10.15468/dl.uywgqw |
|  | *Xerophyta squarrosa* Baker | doi.org/10.15468/dl.rb76jm |
|  | *Xerophyta villosa* (Baker) L.B. Sm. & Ayensu | doi.org/10.15468/dl.7vmwrt |
|  | *Xerophyta viscosa* Baker | doi.org/10.15468/dl.23smj6 |
| WOODSIACEAE | |  |
|  | *Woodsia ilvensis* (L.) R. Br. | doi.org/10.15468/dl.mev4ch |

**Table S2**. List of bioclimatic variables used in this study, retrieved from Chelsa v2.1 database (Karger et al., 2017).

| **Bioclimatic variables** |
| --- |
| BIO1 – Annual Mean Temperature |
| BIO2 – Mean Diurnal Range (Mean of monthly (max temp - min temp)) |
| BIO3 – Isothermality (BIO2/BIO7) (×100) |
| BIO4 – Temperature Seasonality (standard deviation ×100) |
| BIO5 – Max Temperature of Warmest Month |
| BIO6 – Min Temperature of Coldest Month |
| BIO7 – Temperature Annual Range (BIO5-BIO6) |
| BIO8 – Mean Temperature of Wettest Quarter |
| BIO9 – Mean Temperature of Driest Quarter |
| BIO10 – Mean Temperature of Warmest Quarter |
| BIO11 – Mean Temperature of Coldest Quarter |
| BIO12 – Annual Precipitation |
| BIO13 – Precipitation of Wettest Month |
| BIO14 – Precipitation of Driest Month |
| BIO15 – Precipitation Seasonality (Coefficient of Variation) |
| BIO16 – Precipitation of Wettest Quarter |
| BIO17 – Precipitation of Driest Quarter |
| BIO18 – Precipitation of Warmest Quarter |
| BIO19 – Precipitation of Coldest Quarter |

**Table S3.** Global major biomes used in this study, according to Olson et al. (2001).

| **Biomes** |
| --- |
| Tropical and subtropical moist broadleaf forests |
| Tropical and subtropical dry broadleaf forests |
| Tropical and subtropical coniferous forests |
| Temperate broadleaf and mixed forests |
| Temperate coniferous forests |
| Boreal forests/taiga |
| Tropical and subtropical grasslands, savannas, and shrublands |
| Temperate grasslands, savannas, and shrublands |
| Flooded grasslands and savannas |
| Montane grasslands and shrublands |
| Tundra |
| Mediterranean forests, woodlands, and scrub or sclerophyll forests |
| Deserts and xeric shrublands |
| Mangrove |

**Table S4.** R packages used in this study.

| **Package** | **Reference** |
| --- | --- |
| BAT | Cardoso, P, Rigal, F & Carvalho, JC. 2015. BAT - Biodiversity Assessment Tools, an R package for the measurement and estimation of alpha and beta taxon, phylogenetic and functional diversity. Methods in Ecology and Evolution. 6(2):232–236. doi.org/10.1111/2041-210X.12310 |
| broom | Robinson D, Hayes A, Couch S (2022). broom: Convert Statistical Objects into Tidy Tibbles. R package version 1.0.2, <https://CRAN.R-project.org/package=broom> |
| dismo | Hijmans RJ, Phillips S, Leathwick J, Elith J (2022). dismo: Species Distribution Modeling. R package version 1.3-9, <https://CRAN.R-project.org/package=dismo> |
| dplyr | Wickham H, François R, Henry L, Müller K, Vaughan D (2023). dplyr: A Grammar of Data Manipulation. R package version 1.1.4, <https://CRAN.R-project.org/package=dplyr> |
| ggplot2 | Wickham H (2016). ggplot2: Elegant Graphics for Data Analysis. Springer-Verlag New York. ISBN 978-3-319-24277-4 |
| ggpubr | Kassambara A (2022). ggpubr: 'ggplot2' Based Publication Ready Plots. R package version 0.5.0, <https://CRAN.R-project.org/package=ggpubr> |
| humboldt | Brown J (2023). humboldt: Analysis of Species in Environmental Space. R package version 1.0.0.0420121 |
| maptools | Bivand R, Lewin-Koh N (2022). maptools: Tools for Handling Spatial Objects. R package version 1.1-6, <https://CRAN.R-project.org/package=maptools> |
| nlme | Pinheiro J, Bates D, R Core Team (2023). nlme: Linear and Nonlinear Mixed Effects Models. R package version 3.1-164, <https://CRAN.R-project.org/package=nlme> |
| predicts | Hijmans R (2023). predicts: Spatial Prediction Tools. R package version 0.1-11, <https://CRAN.R-project.org/package=predicts> |
| reshape2 | Wickham H (2007). Reshaping Data with the reshape Package. Journal of Statistical Software, 21(12), 1–20 |
| SDMtune | Sergio Vignali, Arnaud G. Barras, Raphaël Arlettaz, Veronika Braunisch (2020). SDMtune: An R package to tune and evaluate species distribution models. Ecology and Evolution, 10(20), 11488–11506. doi:10.1002/ece3.6786 |
| terra | Hijmans R (2023). terra: Spatial Data Analysis. R package version 1.7-65, <https://CRAN.R-project.org/package=terra> |
| usdm | Naimi B, Hamm Na, Groen TA, Skidmore AK, Toxopeus AG (2014). Where is positional uncertainty a problem for species distribution modelling. Ecography, 37, 191-203. doi:10.1111/j.1600-0587.2013.00205.x |
| V.PhyloMaker | Jin, Y & Qian, H. 2019. V.PhyloMaker: an R package that can generate very large phylogenies for vascular plants. Ecography. 42(8):1353–1359. doi.org/10.1111/ecog.04434 |
| vegan | Oksanen J, Simpson G, Blanchet F, Kindt R, Legendre P, Minchin P, O'Hara R, Solymos P, Stevens M, Szoecs E, Wagner H, Barbour M, Bedward M, Bolker B, Borcard D, Carvalho G, Chirico M, De Caceres M, Durand S, Evangelista H, FitzJohn R, Friendly M, Furneaux B, Hannigan G, Hill M, Lahti L, McGlinn D, Ouellette M, Ribeiro Cunha E, Smith T, Stier A, Ter Braak C, Weedon J (2022). vegan: Community Ecology Package. R package version 2.6-4, <https://CRAN.R-project.org/package=vegan> |

**Table S5.** Species distribution range size (assessed by their distribution area), exposure to human-driven threats (assessed by the mean human pressure within their occurrence ranges), and the global major biomes they are found. TM - Tropical and subtropical moist broadleaf forests; TD - Tropical and subtropical dry broadleaf forests; TC - Tropical and subtropical coniferous forests; MB - Temperate broadleaf and mixed forests; MC - Temperate coniferous forests; BF - Boreal forests/taiga; TS - Tropical and subtropical grasslands, savannas, and shrublands; MS - Temperate grasslands, savannas, and shrublands; FS - Flooded grasslands and savannas; MG - Montane grasslands and shrublands; TU – Tundra; MF - Mediterranean forests, woodlands, and scrub or sclerophyll forests; DX - Deserts and xeric shrublands; MA – Mangrove.

| Species | | Distribution area (km²) | Mean cumulative human pressure | Biomes |
| --- | --- | --- | --- | --- |
| ANEMIACEAE | |  |  |  |
|  | *Anemia ferruginea* | 3577895 | 1.66 ± 0.004 | TM, TD, TS, FS, MG, DX |
|  | *Anemia flexuosa* | 2484816 | 0.35 ± 0.002 | TM, TD, TS, FS, MG, DX |
|  | *Anemia mexicana* | 281603 | 1.54 ± 0.008 | TM, TD, TC, MB, MS, DX |
|  | *Anemia rotundifolia* | 674429 | 2.02 ± 0.009 | TM, TD, TS, FS, MG, DX |
|  | *Anemia tomentosa* | 3486511 | 1.97 ± 0.003 | TM, TD, TS, MS, FS, MG, DX |
|  | *Anemia villosa* | 1105302 | 2.3 ± 0.005 | TM, TD, TS, DX |
|  | *Mohria caffrorum* | 656894 | 1.23 ± 0.004 | TM, TS, MG, MF, DX |
| ASPLENIACEAE | |  |  |  |
|  | *Asplenium adiantum-nigrum* | 6678800 | 2.83 ± 0.004 | TM, TD, TC, MB, MC, BF, TS, MS, FS, MG, TU, MF, DX |
|  | *Asplenium aethiopicum* | 3002597 | 0.72 ± 0.002 | TM, TD, TS, MS, FS, MG, MF, DX |
|  | *Asplenium ceterach* | 3436197 | 3.45 ± 0.005 | MB, MC, TS, MS, FS, MG, MF, DX |
|  | *Asplenium cordatum* | 2682872 | 1.08 ± 0.003 | TM, TS, FS, MG, MF, DX |
|  | *Asplenium dalhousiae* | 3039864 | 1.58 ± 0.005 | TM, TD, TC, MB, MC, TS, MS, MG, DX |
|  | *Asplenium friesiorum* | 3716777 | 0.56 ± 0.002 | TM, TD, TS, FS, MG, DX |
|  | *Asplenium megalura* | 3277485 | 0.81 ± 0.002 | TM, TS, FS, MG, DX |
|  | *Asplenium monanthes* | 10739986 | 0.99 ± 0.002 | TM, TD, TC, MB, MC, TS, MS, FS, MG, MF, DX |
|  | *Asplenium obovatum* | 598249 | 4.06 ± 0.011 | MB, MC, MG, MF, DX |
|  | *Asplenium praegracile* | 34424 | 0.24 ± 0.009 | TM, TD, TS, FS, MG |
|  | *Asplenium pringlei* | 25375 | 1.47 ± 0.053 | TD, TC |
|  | *Asplenium ruta-muraria* | 4696200 | 3.35 ± 0.004 | TM, MB, MC, BF, MS, MG, TU, MF, DX |
|  | *Asplenium rutifolium* | 3917476 | 0.63 ± 0.002 | TM, TD, TS, FS, MG, MF, DX |
|  | *Asplenium sandersonii* | 2559962 | 0.62 ± 0.003 | TM, TD, TS, FS, MG, DX |
|  | *Asplenium septentrionale* | 10513892 | 2.55 ± 0.003 | TM, TC, MB, MC, BF, MS, FS, MG, TU, MF, DX |
|  | *Asplenium theciferum* | 396776 | 1.05 ± 0.008 | TM, TD, TC, TS, MG |
|  | *Asplenium trichomanes* | 13446536 | 2.5 ± 0.002 | TM, TD, TC, MB, MC, BF, MS, FS, MG, TU, MF, DX |
|  | *Asplenium uhligii* | 297449 | 1.12 ± 0.008 | TM, TS, MG |
|  | *Pleurosorus rutifolius* | 2279097 | 0.77 ± 0.002 | TM, MB, TS, MS, MG, MF, DX |
| BORYACEAE | |  |  |  |
|  | *Borya constricta* | 481482 | 0.71 ± 0.005 | MF, DX |
|  | *Borya inopinata* | 10462 | 0.96 ± 0.003 | TS |
|  | *Borya mirabilis* | 17042 | 2.59 ± 0.029 | MB, MF |
|  | *Borya nitida* | 113711 | 1.16 ± 0.01 | MF, DX |
|  | *Borya scirpoidea* | 181729 | 1.18 ± 0.009 | MF, DX |
|  | *Borya septentrionalis* | 65255 | 0.21 ± 0.005 | TM, TS |
|  | *Borya sphaerocephala* | 363935 | 0.99 ± 0.005 | MF, DX |
| BROMELIACEAE | |  |  |  |
|  | *Pitcairnia lanuginosa* | 5068642 | 1.36 ± 0.003 | TM, TD, TS, FS, MG, DX |
| CACTACEAE | |  |  |  |
|  | *Blossfeldia liliputana* | 1349 | 0 ± 0 | TD, MG |
| CYPERACEAE | |  |  |  |
|  | *Afrotrilepis pilosa* | 2131579 | 0.7 ± 0.003 | TM, TS, FS, MG |
|  | *Coleochloa abyssinica* | 2266579 | 1.16 ± 0.003 | TM, TS, FS, MG, DX |
|  | *Coleochloa microcephala* | 9839 | 0.1 ± 0.012 | TM, TS |
|  | *Coleochloa setifera* | 1391150 | 0.6 ± 0.004 | TM, TD, TS, FS, MG, DX |
|  | *Microdracoides squamosus* | 218771 | 0.74 ± 0.008 | TM, TS |
|  | *Trilepis ciliatifolia* | 54439 | 3.28 ± 0.016 | TM, TS |
|  | *Trilepis lhotzkiana* | 1002378 | 2.1 ± 0.006 | TM, TD, TS, DX |
|  | *Trilepis microstachya* | 63093 | 3.37 ± 0.013 | TM, TS |
| DAVALLIACEAE | |  |  |  |
|  | *Davallia angustata* | 875346 | 1.93 ± 0.009 | TM, MG |
| DRYOPTERIDACEAE | |  |  |  |
|  | *Elaphoglossum acrostichoides* | 3440229 | 0.72 ± 0.002 | TM, TD, TS, FS, MG, MF, DX |
|  | *Elaphoglossum petiolatum* | 1919233 | 1.3 ± 0.004 | TM, TD, TC, TS, FS, MG, DX |
|  | *Elaphoglossum piloselloides* | 4549431 | 1.3 ± 0.003 | TM, TD, TC, TS, FS, MG, DX |
| GESNERIACEAE | |  |  |  |
|  | *Boea hygrometrica* | 2059751 | 4.37 ± 0.006 | TM, MB, MC, MS, FS, MG, DX |
|  | *Boea hygroscopica* | 165758 | 0.33 ± 0.004 | TM, TS |
|  | *Damrongia clarkeana* | 189243 | 3.03 ± 0.01 | TM, MB, MG, DX |
|  | *Haberlea rhodopensis* | 44692 | 0.87 ± 0.013 | MB, MF |
|  | *Oreocharis mileensis* | 7747 | 2.92 ± 0.062 | TM |
|  | *Paraboea crassifolia* | 505578 | 1.71 ± 0.008 | TM, MB, MC |
|  | *Paraboea rufescens* | 1035116 | 1.48 ± 0.006 | TM, TD, MB, MC, MG |
|  | *Ramonda myconi* | 105360 | 3.3 ± 0.008 | MB, MF |
|  | *Ramonda nathaliae* | 62568 | 1.74 ± 0.024 | MB, MF |
| HYMENOPHYLLACEAE | |  |  |  |
|  | *Cardiomanes reniforme* | 281600 | 0.72 ± 0.005 | MB, MS, MG |
|  | *Crepidomanes chevalieri* | 2482201 | 0.71 ± 0.003 | TM, TS, FS, MG, DX |
|  | *Crepidomanes frappieri* | 181685 | 0.17 ± 0.003 | TM, MG, DX |
|  | *Crepidomanes inopinatum* | 1322408 | 0.72 ± 0.004 | TM, TD, TS, FS, MG, DX |
|  | *Crepidomanes melanotrichum* | 3722012 | 0.75 ± 0.002 | TM, TD, TS, FS, MG, MF, DX |
|  | *Didymoglossum erosum* | 2484518 | 0.52 ± 0.003 | TM, TD, TS, FS, MG, DX |
|  | *Hymenoglossum cruentum* | 316390 | 0.67 ± 0.005 | MB, MS, MG, MF |
|  | *Hymenophyllum capillare* | 3625608 | 0.6 ± 0.002 | TM, TD, TS, FS, MG, DX |
|  | *Hymenophyllum caudiculatum* | 833128 | 2.72 ± 0.004 | TM, TS, DX |
|  | *Hymenophyllum dentatum* | 285397 | 0.61 ± 0.005 | MB, MS, MG, MF |
|  | *Hymenophyllum fucoides* | 3889111 | 0.99 ± 0.003 | TM, TD, TC, TS, FS, MG, DX |
|  | *Hymenophyllum hirsutum* | 8715040 | 0.99 ± 0.002 | TM, TD, TC, TS, FS, MG, DX |
|  | *Hymenophyllum kuhnii* | 1670494 | 0.62 ± 0.003 | TM, TS, FS, MG, DX |
|  | *Hymenophyllum peltatum* | 5724618 | 1.09 ± 0.002 | TM, TD, MB, TS, MS, FS, MG, TU, MF, DX |
|  | *Hymenophyllum plicatum* | 214138 | 0.93 ± 0.008 | MB, MS, MF |
|  | *Hymenophyllum polyanthos* | 5671355 | 1.01 ± 0.002 | TM, TD, TC, TS, FS, MG, DX |
|  | *Hymenophyllum sanguinolentum* | 100457 | 0.81 ± 0.007 | MB, MS, MG |
|  | *Hymenophyllum splendidum* | 1385708 | 0.37 ± 0.002 | TM, TD, TS, FS, MG, DX |
|  | *Hymenophyllum tunbrigense* | 5783178 | 2.25 ± 0.004 | TM, TD, TC, MB, MC, TS, MS, FS, MG, MF, DX |
|  | *Polyphlebium borbonicum* | 4041543 | 0.61 ± 0.002 | TM, TD, TS, FS, MG, DX |
|  | *Trichomanes bucinatum* | 5681 | 2.35 ± 0.087 | TM, TD |
|  | *Trichomanes capillaceum* | 1906077 | 1.21 ± 0.004 | TM, TD, TC, MC, TS, FS, MG, DX |
|  | *Trichomanes diaphanum* | 2326836 | 1.23 ± 0.004 | TM, TD, TC, TS, FS, MG, DX |
|  | *Trichomanes polypodioides* | 2493527 | 1.69 ± 0.004 | TM, TD, TC, TS, FS, MG, DX |
|  | *Trichomanes pyxidiferum* | 3028793 | 1.52 ± 0.003 | TM, TD, TC, TS, FS, MG, DX |
|  | *Trichomanes radicans* | 3704187 | 1.24 ± 0.003 | TM, TD, TC, TS, FS, MG, DX |
|  | *Trichomanes rigidum* | 3129889 | 1.44 ± 0.004 | TM, TD, TC, MC, TS, FS, MG, DX |
| ISOETACEAE | |  |  |  |
|  | *Isoetes australis* | 423442 | 0.72 ± 0.005 | MF, DX |
| LINDERNIACEAE | |  |  |  |
|  | *Craterostigma hirsutum* | 74623 | 0.54 ± 0.012 | TM, TS, MG |
|  | *Craterostigma lanceolatum* | 9094 | 1.31 ± 0.058 | TS |
|  | *Craterostigma plantagineum* | 2680593 | 0.91 ± 0.003 | TM, TD, TS, FS, MG, DX |
|  | *Craterostigma pumilum* | 31445 | 0.41 ± 0.011 | TM, TS, FS, MG |
|  | *Craterostigma wilmsii* | 11393 | 2.26 ± 0.101 | MG |
|  | *Lindernia brevidens* | 23497 | 0.36 ± 0.011 | TM, TS |
|  | *Lindernia intrepidus* | 47696 | 0.46 ± 0.012 | DX |
|  | *Lindernia monroi* | 23596 | 0.28 ± 0.009 | TS |
|  | *Lindernia purpurea* | 7756 | 1.69 ± 0.003 | TM, TS |
|  | *Linderniella pulchella* | 706994 | 0.66 ± 0.006 | TM, TS, FS, MG |
|  | *Linderniella wilmsii* | 665180 | 0.64 ± 0.004 | TM, TS, FS, MG, DX |
| MYROTHAMNACEAE | |  |  |  |
|  | *Myrothamnus flabellifolius* | 2632045 | 0.31 ± 0.001 | TM, TS, FS, MG, DX |
|  | *Myrothamnus moschatus* | 85314 | 0.08 ± 0.003 | TM, TD, DX |
| POACEAE | |  |  |  |
|  | *Eragrostiella bifaria* | 939084 | 3.01 ± 0.012 | TM, TD, TS, FS, DX |
|  | *Eragrostiella brachyphylla* | 7060 | 4.34 ± 0.031 | TM |
|  | *Eragrostiella nardoides* | 92400 | 4.83 ± 0.019 | TM, TD, TC, MB, TS |
|  | *Eragrostis nindensis* | 1634160 | 0.89 ± 0.003 | TM, TD, TS, FS, MG, DX |
|  | *Eragrostis paradoxa* | 64025 | 0.16 ± 0.006 | TS, MG |
|  | *Micrachne patentiflora* | 601639 | 0.34 ± 0.002 | TS, FS, MG, DX |
|  | *Micraira adamsii* | 154273 | 0.25 ± 0.004 | TS, DX |
|  | *Micraira lazaridis* | 50326 | 0.13 ± 0.005 | TS |
|  | *Micraira multinervia* | 11937 | 0.55 ± 0.012 | TS |
|  | *Micraira spinifera* | 1273 | 0.71 ± 0.04 | TS |
|  | *Micraira subulifolia* | 36281 | 0.59 ± 0.018 | TM, MB, TS |
|  | *Micraira tenuis* | 69120 | 0.35 ± 0.006 | TS |
|  | *Micraira viscidula* | 21822 | 0.73 ± 0.01 | TS |
|  | *Microchloa caffra* | 2543562 | 0.75 ± 0.003 | TM, TD, TS, FS, MG, MF, DX |
|  | *Microchloa indica* | 15839389 | 1.14 ± 0.001 | TM, TD, TC, MB, MC, TS, MS, FS, MG, MF, DX |
|  | *Microchloa kunthii* | 12586477 | 0.79 ± 0.001 | TM, TD, TC, MB, MC, TS, MS, FS, MG, MF, DX |
|  | *Oropetium aristatum* | 694373 | 0.71 ± 0.003 | TM, TS, FS |
|  | *Oropetium capense* | 3189424 | 0.97 ± 0.002 | TM, TS, FS, MG, MF, DX |
|  | *Oropetium roxburghianum* | 36094 | 5.42 ± 0.029 | TM, TD, TC, MB, MC, DX |
|  | *Oropetium thomaeum* | 894179 | 3.59 ± 0.012 | TM, TD, TS, MG, DX |
|  | *Sporobolus atrovirens* | 458507 | 1.6 ± 0.009 | TM, TD, TC, DX |
|  | *Sporobolus elongatus* | 772528 | 0.96 ± 0.003 | TM, MB, TS, MS, MG, DX |
|  | *Sporobolus festivus* | 5449194 | 0.72 ± 0.002 | TM, TD, TS, FS, MG, DX |
|  | *Sporobolus fimbriatus* | 4300169 | 0.89 ± 0.002 | TM, TD, TS, FS, MG, MF, DX |
|  | *Sporobolus pellucidus* | 2394551 | 0.56 ± 0.002 | TM, TS, FS, MG, DX |
|  | *Sporobolus ruspolianus* | 21413 | 0.02 ± 0.003 | TS, DX |
|  | *Sporobolus stapfianus* | 2595005 | 0.79 ± 0.003 | TM, TS, FS, MG, DX |
|  | *Styppeiochloa hitchcockii* | 122652 | 0.09 ± 0.002 | TM, TD, MG, DX |
|  | *Tripogon capillatus* | 28964 | 4.17 ± 0.046 | TM, TD, TC, MB, DX |
|  | *Tripogon curvatus* | 2820 | 1.99 ± 0 | TM, TS |
|  | *Tripogon filiformis* | 143942 | 2.17 ± 0.023 | TM, TD, TC, MB, MC, MG |
|  | *Tripogon jacquemontii* | 17561 | 4.63 ± 0.023 | TM, TD, DX |
|  | *Tripogon lisboae* | 36112 | 4.88 ± 0.013 | TM, TD, DX |
|  | *Tripogon major* | 1152465 | 0.52 ± 0.003 | TM, TS, FS, MG |
|  | *Tripogon polyanthus* | - | - | - |
|  | *Tripogonella loliiformis* | 488728 | 0.21 ± 0.002 | TM, TS, DX |
|  | *Tripogonella minima* | 6599605 | 0.86 ± 0.002 | TM, TD, TS, FS, MG, DX |
|  | *Tripogonella spicata* | 8015390 | 1.26 ± 0.002 | TM, TD, TC, MB, MC, TS, MS, FS, MG, MF, DX |
| POLYPODIACEAE | |  |  |  |
|  | *Ctenopteris heterophylla* | 54874 | 0.97 ± 0.01 | MB, MS, MG |
|  | *Loxogramme abyssinica* | 6254267 | 0.63 ± 0.002 | TM, TD, TS, FS, MG, MF, DX |
|  | *Loxogramme lanceolata* | 5425 | 1.77 ± 0.035 | TM |
|  | *Melpomene flabelliformis* | 7783840 | 0.86 ± 0.002 | TM, TD, TC, TS, FS, MG, DX |
|  | *Melpomene peruviana* | 2529361 | 1.2 ± 0.004 | TM, TD, TS, MS, FS, MG, DX |
|  | *Microgramma piloselloides* | 944404 | 0.82 ± 0.005 | TM, TD, TC, FS, MG, DX |
|  | *Pecluma eurybasis* | 1707585 | 0.49 ± 0.003 | TM, TD, TC, TS, FS, MG, DX |
|  | *Platycerium stemaria* | 4035678 | 0.41 ± 0.002 | TM, TS, MG |
|  | *Pleopeltis angusta* | 406187 | 1.55 ± 0.009 | TM, TD, TC, DX |
|  | *Pleopeltis crassinervata* | 406767 | 1.51 ± 0.009 | TM, TD, TC, DX |
|  | *Pleopeltis hirsutissima* | 1442704 | 2.49 ± 0.004 | TM, TD, TS, MS, FS |
|  | *Pleopeltis macrocarpa* | 11156370 | 1.13 ± 0.002 | TM, TD, TC, MB, TS, MS, FS, MG, MF, DX |
|  | *Pleopeltis mexicana* | 524297 | 1.76 ± 0.009 | TM, TD, TC, DX |
|  | *Pleopeltis minima* | 3308897 | 1.69 ± 0.004 | TM, TD, TS, MS, FS, MG, DX |
|  | *Pleopeltis plebeia* | 907879 | 1.46 ± 0.006 | TM, TD, TC, DX |
|  | *Pleopeltis pleopeltifolia* | 2210354 | 2.44 ± 0.004 | TM, TD, TS, MS, FS, DX |
|  | *Pleopeltis polypodioides* | 2187847 | 1.17 ± 0.004 | TM, TD, TC, TS, FS, MG, DX |
|  | *Polypodium cambricum* | 1901515 | 3.39 ± 0.006 | MB, MC, MS, FS, MG, MF, DX |
|  | *Polypodium interjectum* | 1009316 | 5.15 ± 0.008 | MB, MC, MF |
|  | *Polypodium remotum* | 1448606 | 0.75 ± 0.004 | TM, TD, TC, TS, FS, MG, DX |
|  | *Polypodium virginianum* | 3769600 | 1.92 ± 0.004 | MB, MC, BF, MS |
|  | *Polypodium vulgare* | 6557661 | 2.95 ± 0.003 | MB, MC, BF, MS, MG, TU, MF, DX |
| PTERIDACEAE | |  |  |  |
|  | *Actiniopteris australis* | 5364 | 1.77 ± 0.035 | TM |
|  | *Actiniopteris dimorpha* | 4539133 | 0.61 ± 0.002 | TM, TD, TS, FS, MG, DX |
|  | *Actiniopteris radiata* | 2703180 | 1.18 ± 0.005 | TM, TD, TC, TS, FS, MG, DX |
|  | *Actiniopteris semiflabellata* | 7186754 | 1.23 ± 0.002 | TM, TD, TC, MB, MC, TS, MS, FS, MG, DX |
|  | *Adiantum hispidulum* | 4762577 | 1.05 ± 0.003 | TM, TD, TC, MB, TS, MS, FS, MG, TU, MF, DX |
|  | *Adiantum incisum* | 6803278 | 0.85 ± 0.002 | TM, TD, TC, MB, MC, TS, FS, MG, DX |
|  | *Adiantum latifolium* | 2784188 | 1.39 ± 0.004 | TM, TD, TC, TS, FS, DX |
|  | *Adiantum raddianum* | 3954074 | 1.69 ± 0.003 | TM, TD, TC, TS, MS, FS, MG, DX |
|  | *Aleuritopteris albomarginata* | 1788130 | 2.97 ± 0.007 | TM, TD, TC, MB, MC, TS, MG, DX |
|  | *Aleuritopteris farinosa* | 8860802 | 0.86 ± 0.002 | TM, TD, TC, TS, FS, MG, DX |
|  | *Allosorus coriaceus* | 39233 | 0.63 ± 0.012 | TM, TS, MG, DX |
|  | *Argyrochosma fendleri* | 215260 | 0.44 ± 0.005 | MC, MS, DX |
|  | *Astrolepis cochisensis* | 1215694 | 0.93 ± 0.003 | TM, TD, TC, MC, MS, MF, DX |
|  | *Astrolepis integerrima* | 1967585 | 1.34 ± 0.003 | TM, TD, TC, MB, MC, TS, MS, DX |
|  | *Astrolepis sinuata* | 3439082 | 1.14 ± 0.003 | TM, TD, TC, MB, MC, TS, MS, MG, MF, DX |
|  | *Bommeria hispida* | 1594949 | 0.93 ± 0.003 | TM, TD, TC, MC, MS, DX |
|  | *Cheilanthes bonariensis* | 4194308 | 0.9 ± 0.002 | TM, TD, TC, MC, TS, MS, FS, MG, MF, DX |
|  | *Cheilanthes buchtienii* | 1197893 | 0.72 ± 0.004 | TM, TD, TS, MS, FS, MG, DX |
|  | *Cheilanthes capensis* | 398963 | 1.33 ± 0.005 | TM, MG, MF, DX |
|  | *Cheilanthes catanensis* | 1904160 | 1.81 ± 0.005 | MB, MC, MS, FS, MG, MF, DX |
|  | *Cheilanthes depauperata* | 35932 | 1.9 ± 0.018 | MF, DX |
|  | *Cheilanthes dinteri* | 285919 | 0.8 ± 0.007 | TS, DX |
|  | *Cheilanthes distans* | 1895183 | 0.99 ± 0.002 | TM, TD, MB, TS, MS, MG, MF, DX |
|  | *Cheilanthes eckloniana* | 1173610 | 1.26 ± 0.004 | TM, TS, MG, MF, DX |
|  | *Cheilanthes fragillima* | 180081 | 0.42 ± 0.008 | TM, TS |
|  | *Cheilanthes glauca* | 429835 | 0.68 ± 0.005 | MB, MS, MG, MF |
|  | *Cheilanthes gracillima* | 1226344 | 0.82 ± 0.004 | MB, MC, MS, MF, DX |
|  | *Cheilanthes hirta* | 1313426 | 0.64 ± 0.003 | TM, TD, TS, MG, MF, DX |
|  | *Cheilanthes inaequalis* | 2861040 | 0.91 ± 0.003 | TM, TD, TS, FS, MG, DX |
|  | *Cheilanthes lasiophylla* | 2532276 | 0.5 ± 0.002 | TM, MB, TS, MS, MG, MF, DX |
|  | *Cheilanthes lendigera* | 1971162 | 1.23 ± 0.004 | TM, TD, TC, MC, TS, MG, DX |
|  | *Cheilanthes marginata* | 4109387 | 0.85 ± 0.002 | TM, TD, TC, TS, FS, MG, DX |
|  | *Cheilanthes marlothii* | 20669 | 1.37 ± 0.025 | TS, DX |
|  | *Cheilanthes multifida* | 327326 | 0.41 ± 0.005 | TM, TS, FS, MG, DX |
|  | *Cheilanthes myriophylla* | 2518493 | 0.82 ± 0.003 | TM, TD, TC, TS, MS, FS, MG, DX |
|  | *Cheilanthes nitidula* | 170829 | 2.32 ± 0.022 | TM, MB, MC, MG |
|  | *Cheilanthes notholaenoides* | 2173969 | 1.21 ± 0.003 | TM, TD, TC, TS, MG, DX |
|  | *Cheilanthes parryi* | 465424 | 0.86 ± 0.006 | TC, MC, MF, DX |
|  | *Cheilanthes parviloba* | 39778 | 0.69 ± 0.01 | TM, MG, MF, DX |
|  | *Cheilanthes pringlei* | 418581 | 0.75 ± 0.004 | TD, TC, MC, MF, DX |
|  | *Cheilanthes quadripinnata* | 3523773 | 0.77 ± 0.002 | TM, TD, TS, FS, MG, MF, DX |
|  | *Cheilanthes sieberi* | 2971921 | 0.62 ± 0.002 | TM, MB, TS, MS, MG, MF, DX |
|  | *Cheilanthes tenuifolia* | 2897500 | 1.97 ± 0.005 | TM, TD, TC, MB, MC, TS, MG, DX |
|  | *Cheilanthes tomentosa* | 1547943 | 1.82 ± 0.004 | TM, TD, TC, MB, MC, TS, MS, MF, DX |
|  | *Cheilanthes viridis* | 4029505 | 0.86 ± 0.002 | TM, TD, TS, FS, MG, MF, DX |
|  | *Cheilanthes wrightii* | 941516 | 0.8 ± 0.003 | TD, TC, MC, MS, DX |
|  | *Cosentinia vellea* | 773457 | 2.79 ± 0.006 | MB, MC, MS, FS, MG, MF, DX |
|  | *Doryopteris collina* | 1937321 | 2.16 ± 0.005 | TM, TD, TS, FS, DX |
|  | *Doryopteris concolor* | 4637940 | 1.62 ± 0.003 | TM, TD, TC, TS, MS, FS, MG, DX |
|  | *Doryopteris kitchingii* | 68525 | 0.09 ± 0.003 | TM, TD, MG, DX |
|  | *Doryopteris pedata* | 110230 | 1.74 ± 0.012 | TM, TD, TC, FS |
|  | *Doryopteris triphylla* | 899534 | 1.76 ± 0.005 | TM, TD, TS, MS, FS, MG |
|  | *Doryopteris varians* | 881055 | 2.74 ± 0.005 | TM, TD, TS, DX |
|  | *Haplopteris volkensii* | 1736880 | 0.81 ± 0.003 | TM, TD, TS, FS, MG, DX |
|  | *Hemionitis palmata* | 1908364 | 1.17 ± 0.004 | TM, TD, TC, TS, FS, MG, DX |
|  | *Hemionitis tomentosa* | 2606766 | 1.92 ± 0.004 | TM, TD, TS, MS, FS, MG, DX |
|  | *Myriopteris rufa* | 1806843 | 1.32 ± 0.003 | TM, TD, TC, MB, MC, MS, DX |
|  | *Negripteris scioana* | 68334 | 1.14 ± 0.014 | TS, DX |
|  | *Notholaena dipinnata* | 23531 | 3.25 ± 0.05 | TM, MB |
|  | *Notholaena lanuginosa* | 477718 | 2 ± 0.008 | MB, MC, MS, FS, MF, DX |
|  | *Notholaena muelleri* | 387065 | 0.66 ± 0.004 | TM, MB, TS |
|  | *Onychium divaricatum* | 960161 | 0.88 ± 0.004 | TM, MB, MC, TS, MS, MG, DX |
|  | *Paragymnopteris marantae* | 1399161 | 1.17 ± 0.005 | TM, MB, MC, TS, MG, MF, DX |
|  | *Pellaea andromedifolia* | 544414 | 1.29 ± 0.007 | TD, MB, MC, MS, MF, DX |
|  | *Pellaea atropurpurea* | 3332371 | 2.42 ± 0.004 | TM, TD, TC, MB, MC, BF, MS, MF, DX |
|  | *Pellaea boivinii* | 1497591 | 1.63 ± 0.008 | TM, TD, TS, FS, MG, DX |
|  | *Pellaea brachyptera* | 233188 | 0.78 ± 0.009 | MC, MS, MF, DX |
|  | *Pellaea bridgesii* | 324607 | 1.11 ± 0.01 | MC, MS, MF, DX |
|  | *Pellaea calomelanos* | 9718400 | 1.07 ± 0.002 | TM, TD, MB, MC, TS, FS, MG, MF, DX |
|  | *Pellaea dura* | 2191030 | 0.65 ± 0.003 | TM, TD, TS, FS, MG, DX |
|  | *Pellaea falcata* | 1048174 | 0.9 ± 0.003 | TM, TD, MB, TS, MS, MG, MF |
|  | *Pellaea glabella* | 1196365 | 3.19 ± 0.007 | MB, MC, MS |
|  | *Pellaea longipilosa* | 2658527 | 0.67 ± 0.002 | TM, TD, TS, FS, MG, DX |
|  | *Pellaea mucronata* | 696910 | 1.15 ± 0.006 | TC, MC, MS, MF, DX |
|  | *Pellaea ovata* | 1964923 | 1.24 ± 0.004 | TM, TD, TC, MB, TS, MS, FS, MG, MF, DX |
|  | *Pellaea pectiniformis* | 4070139 | 0.45 ± 0.002 | TM, TD, TS, FS, MG, DX |
|  | *Pellaea rotundifolia* | 96756 | 1.01 ± 0.009 | MB, MS, MG |
|  | *Pellaea sagittata* | 2695962 | 0.95 ± 0.003 | TM, TD, TC, TS, MG, DX |
|  | *Pellaea ternifolia* | 5170834 | 0.9 ± 0.002 | TM, TD, TC, MB, MC, TS, MS, FS, MG, MF, DX |
|  | *Pellaea truncata* | 999996 | 0.96 ± 0.004 | TC, MB, MC, MS, MF, DX |
|  | *Pellaea wrightiana* | 1255184 | 1.13 ± 0.004 | TD, TC, MB, MC, MS, MF, DX |
|  | *Pentagramma triangularis* | 1214382 | 0.98 ± 0.004 | TD, TC, MB, MC, MS, MF, DX |
|  | *Vittaria guineensis* | 4554486 | 0.57 ± 0.002 | TM, TD, TS, FS, MG |
|  | *Vittaria isoetifolia* | 2108371 | 0.48 ± 0.002 | TM, TD, TS, FS, MG, MF, DX |
| SCHIZAEACEAE | |  |  |  |
|  | *Schizaea pusilla* | 843097 | 1.5 ± 0.008 | TM, TD, MB, MC, BF, FS, MG, TU |
| SELAGINELLACEAE | |  |  |  |
|  | *Selaginella arizonica* | 724740 | 0.76 ± 0.003 | TM, TD, TC, MC, TS, MS, MF, DX |
|  | *Selaginella bryopteris* | 977044 | 0.56 ± 0.003 | TM, TS, MG, DX |
|  | *Selaginella caffrorum* | 970424 | 0.96 ± 0.004 | TM, TS, FS, MG, MF, DX |
|  | *Selaginella convoluta* | 3510585 | 1.33 ± 0.003 | TM, TD, TC, TS, FS, MG, DX |
|  | *Selaginella densa* | 3263306 | 1.38 ± 0.003 | TC, MB, MC, BF, MS, TU, DX |
|  | *Selaginella digitata* | 150859 | 0.27 ± 0.006 | TM, TD, MG, DX |
|  | *Selaginella dregei* | 1409170 | 0.72 ± 0.003 | TM, TS, FS, MG, DX |
|  | *Selaginella echinata* | 101108 | 0.22 ± 0.007 | TM, TD, DX |
|  | *Selaginella eremophila* | 289361 | 1.02 ± 0.009 | TD, TC, MC, MF, DX |
|  | *Selaginella helicoclada* | 87716 | 0.14 ± 0.004 | TM, TD, DX |
|  | *Selaginella helvetica* | 2743389 | 3.13 ± 0.005 | TM, MB, MC, BF, MS, FS, MG, MF, DX |
|  | *Selaginella imbricata* | 245306 | 0.91 ± 0.007 | TM, TS, MG, DX |
|  | *Selaginella lepidophylla* | 1383964 | 1.23 ± 0.004 | TM, TD, TC, MC, MS, DX |
|  | *Selaginella nivea* | 54153 | 0.34 ± 0.007 | TM, DX |
|  | *Selaginella njamnjamensis* | 54506 | 0.83 ± 0.016 | TM, TS |
|  | *Selaginella peruviana* | 4436204 | 1.05 ± 0.002 | TM, TD, TC, MB, MC, TS, MS, MG, DX |
|  | *Selaginella phillipsiana* | 754216 | 0.75 ± 0.005 | TM, TS, MG, DX |
|  | *Selaginella pilifera* | 999928 | 1.23 ± 0.004 | TM, TD, TC, MB, MC, TS, DX |
|  | *Selaginella rupincola* | 1060859 | 1.15 ± 0.005 | TM, TD, TC, MC, MS, DX |
|  | *Selaginella sartorii* | 937965 | 1.22 ± 0.006 | TM, TD, TC, TS, MG, DX |
|  | *Selaginella sellowii* | 4358293 | 1.23 ± 0.003 | TM, TD, TC, TS, MS, FS, MG, DX |
|  | *Selaginella tamariscina* | 2017334 | 3.18 ± 0.006 | TM, TD, MB, MC, FS, MG, DX |
|  | *Selaginella trisulcata* | 1595668 | 0.36 ± 0.002 | TM, TD, TS, FS, MG, DX |
|  | *Selaginella yemensis* | 710357 | 0.65 ± 0.005 | TM, TS, MG, DX |
| TECTARIACEAE | |  |  |  |
|  | *Arthropteris orientalis* | 6378282 | 0.57 ± 0.001 | TM, TD, TS, FS, MG, DX |
| VELLOZIACEAE | |  |  |  |
|  | *Acanthochlamys bracteata* | 373272 | 0.77 ± 0.008 | TM, MB, MC, MG |
|  | *Barbacenia blackii* | 38393 | 2.78 ± 0.023 | TM, TS |
|  | *Barbacenia fanniae* | 8280 | 3.56 ± 0.023 | TM |
|  | *Barbacenia flava* | 163454 | 2.93 ± 0.013 | TM, TS |
|  | *Barbacenia fragrans* | 19155 | 3.65 ± 0.022 | TM, TS |
|  | *Barbacenia gentianoides* | 28059 | 1.93 ± 0.025 | TM, TS |
|  | *Barbacenia gounelleana* | 20460 | 2.75 ± 0.024 | TM, TS |
|  | *Barbacenia graminifolia* | 71030 | 2.71 ± 0.021 | TM, TS |
|  | *Barbacenia longiflora* | 32595 | 1.91 ± 0.025 | TM, TS |
|  | *Barbacenia longiscapa* | 27875 | 1.63 ± 0.024 | TM, TS |
|  | *Barbacenia macrantha* | 67621 | 2.37 ± 0.018 | TM, TS |
|  | *Barbacenia purpurea* | 175543 | 2.84 ± 0.011 | TM, TS |
|  | *Barbacenia riedeliana* | 53304 | 2.16 ± 0.021 | TM, TS |
|  | *Barbacenia tomentosa* | 74557 | 3.01 ± 0.014 | TM, TS |
|  | *Barbaceniopsis boliviensis* | 378961 | 0.02 ± 0.001 | TM, TD, TS, MG |
|  | *Barbaceniopsis humahuaquensis* | 7471 | 0 ± 0 | TM, TS, MG |
|  | *Vellozia albiflora* | 294417 | 2.66 ± 0.01 | TM, TS |
|  | *Vellozia andina* | 23530 | 0.04 ± 0.003 | TM, TD, TS |
|  | *Vellozia angustifolia* | 174385 | 3 ± 0.012 | TM, TS |
|  | *Vellozia candida* | 188764 | 2.28 ± 0.009 | TM, TS, DX |
|  | *Vellozia caput-ardeae* | 19442 | 1.77 ± 0.028 | TM, TS |
|  | *Vellozia caruncularis* | 218932 | 2.5 ± 0.012 | TM, TD, TS |
|  | *Vellozia ciliata* | 4350 | 1.13 ± 0.009 | TS |
|  | *Vellozia compacta* | 175705 | 2.55 ± 0.012 | TM, TS |
|  | *Vellozia declinans* | 162210 | 3.23 ± 0.015 | TM, TS |
|  | *Vellozia epidendroides* | 144199 | 2.61 ± 0.013 | TM, TS |
|  | *Vellozia flavicans* | 1238652 | 2.26 ± 0.005 | TM, TD, TS, FS, DX |
|  | *Vellozia glochidea* | 443905 | 3.06 ± 0.007 | TM, TS |
|  | *Vellozia hatschbachii* | 13062 | 2.09 ± 0.041 | TM, TS |
|  | *Vellozia hirsuta* | 358423 | 1.45 ± 0.006 | TM, TD, TS, DX |
|  | *Vellozia nanuzae* | 46331 | 2.57 ± 0.021 | TM, TS, DX |
|  | *Vellozia nivea* | 77346 | 2.65 ± 0.017 | TM, TS |
|  | *Vellozia plicata* | 720633 | 1.41 ± 0.006 | TM, TD, TS, DX |
|  | *Vellozia pulchra* | 60147 | 1.92 ± 0.008 | TM, DX |
|  | *Vellozia resinosa* | 40910 | 2.6 ± 0.025 | TM, TS |
|  | *Vellozia sellowii* | 26793 | 3.24 ± 0.021 | TM, TS |
|  | *Vellozia semirii* | 7896 | 1.27 ± 0 | TM, TS |
|  | *Vellozia squalida* | 89527 | 3.1 ± 0.011 | TM, TS, DX |
|  | *Vellozia streptophylla* | 12162 | 1.17 ± 0.006 | TM, TS |
|  | *Vellozia subscabra* | 112451 | 2.2 ± 0.016 | TM, TS, DX |
|  | *Vellozia taxifolia* | 23316 | 2.15 ± 0.028 | TM, TS |
|  | *Vellozia tubiflora* | 1737531 | 1.16 ± 0.005 | TM, TD, TS, FS, DX |
|  | *Vellozia variabilis* | 1256022 | 1.9 ± 0.006 | TM, TD, TS, FS, DX |
|  | *Vellozia variegata* | 143461 | 2.65 ± 0.01 | TM, TS, DX |
|  | *Vellozia verruculosa* | 166383 | 2.75 ± 0.011 | TM, TS |
|  | *Xerophyta dasylirioides* | 110135 | 0.15 ± 0.004 | TM, TD, MG, DX |
|  | *Xerophyta eglandulosa* | 3607 | 0 ± 0 | TM |
|  | *Xerophyta elegans* | 140632 | 0.49 ± 0.006 | TM, TS, MG |
|  | *Xerophyta equisetoides* | 62487 | 0.21 ± 0.009 | TS, MG |
|  | *Xerophyta humilis* | 409859 | 0.18 ± 0.003 | TM, TS, FS, MG, DX |
|  | *Xerophyta nandrasanae* | 7926 | 0.11 ± 0.009 | TM |
|  | *Xerophyta pectinata* | 102017 | 0.18 ± 0.005 | TM, TD, DX |
|  | *Xerophyta pinifolia* | 34026 | 0.16 ± 0.006 | TM, DX |
|  | *Xerophyta retinervis* | 89867 | 1 ± 0.023 | TM, TS, MG |
|  | *Xerophyta rippsteinii* | 10632 | 0.84 ± 0.027 | TM, MG |
|  | *Xerophyta scabrida* | 803980 | 0.34 ± 0.002 | TM, TD, TS, FS, MG |
|  | *Xerophyta schlechteri* | 108144 | 0.85 ± 0.016 | TS, MG |
|  | *Xerophyta schnizleinia* | 1287624 | 0.77 ± 0.003 | TM, TS, MG, DX |
|  | *Xerophyta spekei* | 54731 | 0.25 ± 0.007 | TM, TS, FS, MG |
|  | *Xerophyta splendens* | 11409 | 0.03 ± 0.003 | TM, TS, MG |
|  | *Xerophyta squarrosa* | 117445 | 0.84 ± 0.015 | TS, MG |
|  | *Xerophyta villosa* | 170819 | 0.63 ± 0.009 | TS, FS, MG |
|  | *Xerophyta viscosa* | 36391 | 0.67 ± 0.014 | MG |
| WOODSIACEAE | |  |  |  |
|  | *Woodsia ilvensis* | 2507753 | 2.28 ± 0.005 | MB, MC, BF, MS |

Compiling species occurrence across global major biomes

Species distribution hypotheses

Data collection and species distribution models

Estimation of species distribution range size

Extinction simulations of each species of major biomes by excluding one species at a time and estimating decreases in PD for each exclusion round

Excluding species according to their range sizes

(decreases in PD for sequential exclusion of speices, from small-ranged to broad-ranged species)

Excluding species randomly

(mean of decreases in PD for 99 random extinction simulations)

**Evaluating the importance of small-ranged species to biodiversity in the ecological context in which they occur**

Calculating the extinction curves AUC

Estimation of species exposure to human-driven threats

Calculating the magnitude of human pressure within species distribution range

(as the mean cumulative human pressure)

**Fig. S1.** Schematic representation of the study’s aim and methods used to test the raised hypotheses. PD stands for phylogenetic diversity, while AUC correspond to the Area Under the Curve.

**MaxEnt modelling**

(50% consensus between 5 models)

**IDW modelling**

(50% consensus between 5 models)

More than 5 occurrence points?

Yes

No

**Ca50 approach**

Retrieving 19 bioclimatic variables from CHELSA database

**Species list**

Species occurrence points datasets

Taxonomic harmonization using Tropicos taxonomic backbone

Retrieving occurrence records from Tropicos, GBIF, and speciesLink databases

No

Is data duplicated, erroneous, uncertain, or missing locality descriptions and and coordinates?

Yes

Data exclusion

Yes

No

Is variable collinear or exhibit low relative contribution to species distribution?

Variable exclusion

Variable used for model calibration

- Occurrence points split for cross-validation (80% for training, 20% for testing)

- Background points (100 if presence points are < 100, 1000 if < 300, or 10000 if > 300)

- Evaluation with AUC and TSS

**Species distribution hypothesis**

Is AUC higher than 0.8 and TSS higher than 0.6?

50% consensus between IDW and MaxEnt

No

Yes

**Fig. S2.** Schematic representation of methodological workflow to estimate species distribution hypotheses. The Ca50, IDW, and MaxEnt correspond to Circular area (sensu Hijmans & Spooner, 2001), Inverse Distance Weighted interpolation technique, and Maximum Entropy techniques. AUC and TSS stand for the Area Under the Receiver Operating Characteristic Curve and the True Skill Statistics cross-validation methods.
